# Supplementary material
Source: HighWire-hosted journal article supplement (https://bjo.bmj.com/content/103/1/8)
Supplement: inline-supplementary-material-1 [file inline-supplementary-material-1.pdf]

**Supplementary table1. Search strategy for vitamin D and myopia**

---

1. exp vitamin D/ or vitamin D.mp. or exp vitamin D deficiency/
  2. vitamin D3.mp. or exp colecalciferol/ or exp calcitriol/ or 25-OH D.mp. or exp calcifediol/
  3. 24-Hydroxylase.mp.
  4. 1,25-Dihydroxyvitamin D3 24-Hydroxylase.mp.
  5. 1 or 2 or 3 or 4
  6. exp high myopia/ or myopia\*.mp. or exp myopia/
  7. refractive error.mp. or exp refraction error/
  8. nearsighted\*.mp.
  9. exp refraction index/ or refraction.mp.
  10. 6 or 7 or 8 or 9
  11. 5 and 10
-
