# Supplementary material
Source: HighWire-hosted journal article supplement (https://bjo.bmj.com/content/103/1/8)
Supplement: inline-supplementary-material-4 [file inline-supplementary-material-4.pdf]

**Supplementary table 5. Summarized Results from the ALSPAC Data Buddy Team**

|          | Age | Sample size       | Myopia                | Non-myopia            | OR (95% CI)               |                         | Coefficient                          |                                      |
|----------|-----|-------------------|-----------------------|-----------------------|---------------------------|-------------------------|--------------------------------------|--------------------------------------|
|          |     | Myopia/Non-myopia | Mean ± SD<br>(nmol/L) | Mean ± SD<br>(nmol/L) | unadjusted<br>(10 nmol/L) | adjusted<br>(10 nmol/L) | unadjusted<br>(Diopter per nmol/L)   | adjusted<br>(Diopter per nmol/L)     |
| 25(OH)D  | 7   | 93 / 963          | 75.62 ± 29.14         | 79.40 ± 30.83         | 0.96 (0.89 to 1.03)       | 0.96 (0.88 to 1.04)     | -5.98E-04<br>(-2.38E-03 to 1.18E-03) | -2.5E-04<br>(-2.53E-03 to 2.03E-03)  |
| 25(OH)D3 | 7   | 93 / 963          | 70.89 ± 28.41         | 74.93 ± 31.01         | 0.96 (0.89 to 1.03)       | 0.96 (0.88 to 1.05)     | -7.96E-04<br>(-2.57E-03 to 9.76E-03) | -6.35E-04<br>(-2.91E-03 to 1.64E-03) |
| 25(OH)D  | 11  | 139 / 869         | 58.85 ± 18.64         | 59.07 ± 19.54         | 1.006 (0.91 to 1.11)      | 1.022 (0.91 to 1.15)    | -5.12E-04<br>(-3.51E-03 to 2.49E-03) | 2.84E-03<br>(-5.74E-04 to 6.26E-03)  |
| 25(OH)D3 | 11  | 139 / 869         | 53.19 ± 18.44         | 53.95 ± 19.32         | 1.022 (0.90 to 1.15)      | 1.026 (0.90 to 1.16)    | -1.13E-04<br>(-3.14E-03 to 2.92E-03) | 2.81E-03<br>(-5.3E-04 to 6.15E-03)   |

Adjusted for age, gender, time spent outdoors, near works and parental educational level
