# Supplementary material
Source: HighWire-hosted journal article supplement (https://bjo.bmj.com/content/103/1/8)
Supplement: inline-supplementary-material-5 [file inline-supplementary-material-5.pdf]

Supplementary table 6. Characteristics of studies on the association between vitamin D pathway genes and myopia

| <b>First Author</b> | <b>Year</b> | <b>SNP ID</b> | <b>Gene Name</b> | <b>Ethnicity</b> | <b>Sample size</b> | <b>MAF</b> | <b>Minor allele</b> |
|---------------------|-------------|---------------|------------------|------------------|--------------------|------------|---------------------|
| Tideman             | 2016        | rs7975232     | <i>VDR</i>       | Mixed            | 3928               | 0.45       | C                   |
|                     |             | rs2239182     |                  |                  | 3928               | 0.48       | T                   |
|                     |             | rs3819545     |                  |                  | 3928               | 0.38       | G                   |
|                     |             | rs2853559     |                  |                  | 3928               | 0.37       | A                   |
| Mutti               | 2011        | rs7975232     | <i>VDR</i>       | Caucasian        | 370                | 0.5        | A                   |
|                     |             | rs2239182     |                  |                  | 370                | 0.49       | G                   |
|                     |             | rs3819545     |                  |                  | 370                | 0.41       | C                   |
|                     |             | rs2853559     |                  |                  | 370                | 0.36       | T                   |
